# Supplementary material
Source: Springer Nature journal article supplement (https://www.springermedizin.de/resource/supplementary/12950_2009_120_MOESM1_ESM.pdf/9558020)

A

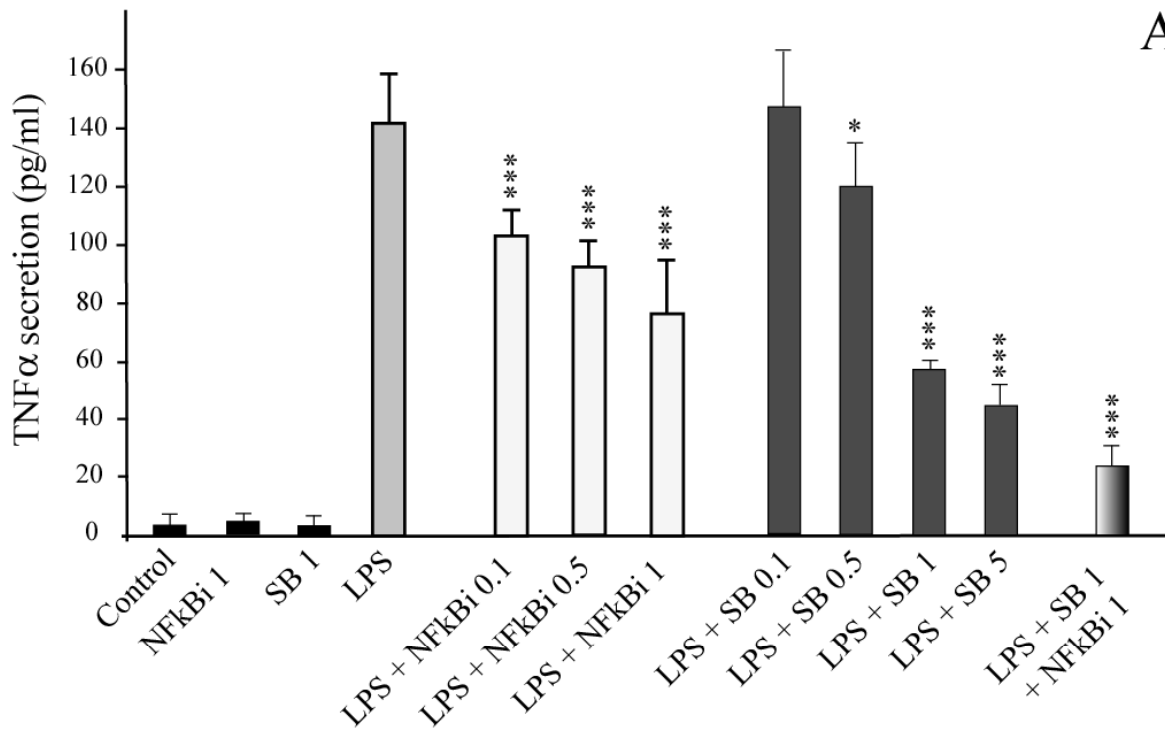

B

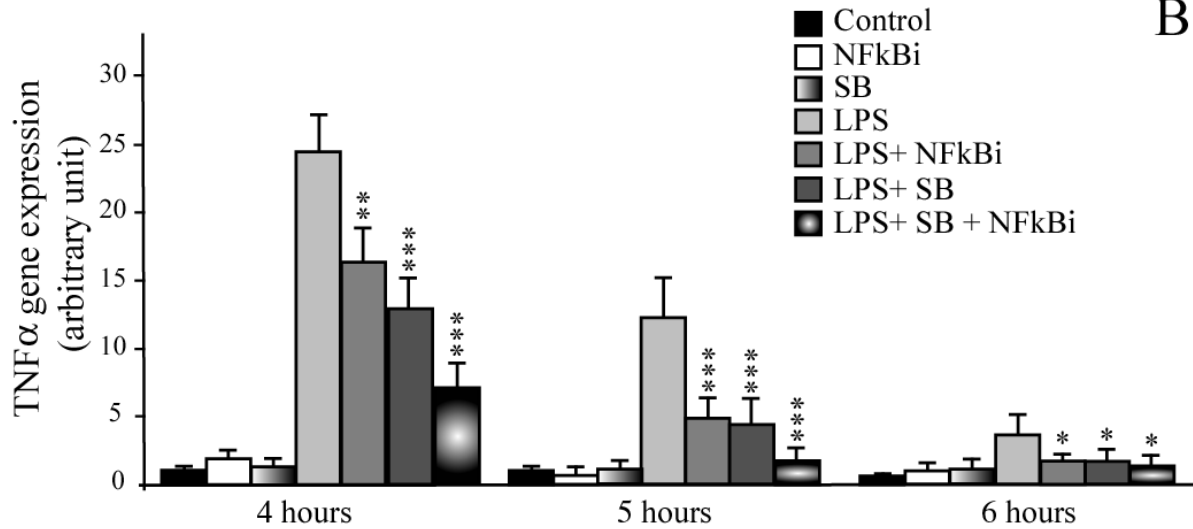

Supplement: MOESM1 [file 9558020]
